# Supplementary material for: Blood Group Antigens C, Lub and P1 May Have a Role in HIV Infection in Africans
Source: PubMed Central journal article supplement (PMC4764295; doi:10.1371/journal.pone.0149883), 2016-02-22
Supplement: pone.0149883.s001.pdf [file pone.0149883.s001.pdf]

| P1 | M | N | C | c | E | e | Jka | Jkb | A | B | AB | O | D | Lua | Lub | Kpa | Kpb | Fya | Fyb | S | s | Lea | Leb | HIV Status | Duffynull |   |
|----|---|---|---|---|---|---|-----|-----|---|---|----|---|---|-----|-----|-----|-----|-----|-----|---|---|-----|-----|------------|-----------|---|
| 0  | 0 | 1 | 0 | 1 | 0 | 1 |     |     | 0 | 1 | 1  | 0 | 1 | 0   | 1   | 0   | 1   | 0   | 0   | 0 | 1 | 0   | 0   | 0          | 1         |   |
| 1  | 1 | 0 | 0 | 1 | 1 | 0 |     |     | 1 | 1 | 1  | 0 | 1 | 0   | 1   | 0   | 1   | 0   | 1   | 1 | 0 | 0   | 1   | 0          | 1         | 0 |
| 1  | 0 | 1 | 0 | 1 | 0 | 1 |     |     | 0 | 1 | 1  | 0 | 1 | 0   | 1   | 0   | 1   | 1   | 0   | 0 | 1 | 0   | 1   | 0          | 1         | 0 |
| 0  | 1 | 1 | 0 | 1 | 0 | 1 |     |     | 1 | 0 | 1  | 0 | 1 | 0   | 1   | 0   | 1   | 0   | 0   | 0 | 1 | 0   | 0   | 0          | 1         | 0 |
| 1  | 1 | 1 | 0 | 1 | 0 | 1 |     |     | 1 | 0 | 1  | 0 | 1 | 0   | 1   | 0   | 1   | 0   | 0   | 0 | 1 | 0   | 0   | 0          | 1         | 0 |
| 1  | 1 | 1 | 0 | 1 | 0 | 1 |     |     | 1 | 0 | 1  | 0 | 1 | 0   | 1   | 0   | 1   | 0   | 0   | 0 | 1 | 0   | 0   | 0          | 1         | 0 |
| 1  | 1 | 1 | 0 | 1 | 0 | 1 |     |     | 0 | 0 | 0  | 1 | 1 | 0   | 1   | 0   | 0   | 0   | 0   | 0 | 1 | 0   | 1   | 0          | 1         | 0 |
| 1  | 1 | 0 | 0 | 1 | 0 | 1 |     |     | 0 | 1 | 1  | 0 | 1 | 0   | 1   | 0   | 0   | 0   | 0   | 0 | 1 | 1   | 0   | 1          | 0         | 1 |
| 1  | 1 | 1 | 1 | 1 | 0 | 1 |     |     | 0 | 0 | 0  | 1 | 1 | 0   | 1   | 0   | 1   | 0   | 0   | 1 | 1 | 0   | 1   | 0          | 1         | 0 |
| 1  | 1 | 1 | 0 | 1 | 0 | 1 |     |     | 0 | 0 | 0  | 1 | 0 | 0   | 1   | 0   | 1   | 1   | 1   | 1 | 1 | 1   | 0   | 0          | 0         | 0 |
| 1  | 1 | 0 | 0 | 1 | 0 | 1 |     |     | 0 | 0 | 0  | 1 | 1 | 1   | 1   | 0   | 1   | 0   | 0   | 0 | 1 | 0   | 0   | 0          | 1         | 0 |
| 1  | 1 | 1 | 0 | 1 | 0 | 1 |     |     | 0 | 0 | 0  | 1 | 1 | 0   | 1   | 0   | 1   | 0   | 0   | 0 | 1 | 1   | 0   | 0          | 0         | 1 |
| 1  | 1 | 0 | 0 | 1 | 1 | 1 |     |     | 1 | 0 | 1  | 0 | 1 | 0   | 1   | 0   | 1   | 0   | 0   | 0 | 1 | 0   | 1   | 0          | 1         | 0 |
| 1  | 1 | 1 | 0 | 1 | 0 | 1 |     |     | 1 | 1 | 1  | 0 | 1 | 0   | 1   | 0   | 0   | 0   | 0   | 0 | 1 | 0   | 1   | 0          | 1         | 0 |
| 1  | 0 | 1 | 1 | 1 | 0 | 1 |     |     | 0 | 0 | 0  | 1 | 1 | 0   | 1   | 0   | 1   | 0   | 0   | 0 | 1 | 0   | 1   | 0          | 1         | 0 |
| 1  | 1 | 1 | 1 | 1 | 0 | 1 |     |     | 0 | 1 | 1  | 0 | 1 | 0   | 0   | 0   | 1   | 0   | 0   | 0 | 1 | 0   | 0   | 0          | 1         | 0 |
| 0  | 1 | 1 | 0 | 1 | 1 | 1 |     |     | 0 | 1 | 1  | 0 | 1 | 0   | 1   | 0   | 1   | 0   | 0   | 0 | 1 | 0   | 0   | 0          | 1         | 0 |
| 1  | 1 | 0 | 0 | 1 | 0 | 1 |     |     | 0 | 0 | 0  | 1 | 1 | 0   | 0   | 0   | 0   | 1   | 0   | 0 | 1 | 0   | 1   | 0          | 1         | 0 |
| 1  | 1 | 0 | 0 | 1 | 1 | 1 |     |     | 0 | 1 | 1  | 0 | 1 | 0   | 0   | 0   | 1   | 0   | 0   | 0 | 1 | 1   | 1   | 1          | 0         | 1 |
| 1  | 1 | 0 | 0 | 1 | 0 | 1 |     |     | 0 | 1 | 1  | 0 | 1 | 0   | 0   | 0   | 1   | 0   | 0   | 0 | 1 | 1   | 1   | 0          | 1         | 0 |
| 1  | 1 | 0 | 0 | 1 | 1 | 1 |     |     | 0 | 1 | 1  | 0 | 1 | 0   | 0   | 0   | 1   | 0   | 0   | 0 | 1 | 1   | 1   | 0          | 1         | 0 |
| 1  | 1 | 0 | 0 | 1 | 0 | 1 |     |     | 0 | 0 | 0  | 1 | 1 | 1   | 1   | 0   | 0   | 0   | 0   | 0 | 1 | 1   | 0   | 1          | 0         | 1 |
| 1  | 1 | 1 | 0 | 1 | 0 | 1 |     |     | 1 | 0 | 1  | 0 | 1 | 0   | 1   | 0   | 0   | 0   | 0   | 0 | 1 | 1   | 1   | 1          | 0         | 1 |
| 0  | 1 | 1 | 1 | 1 | 1 | 1 |     |     | 0 | 1 | 1  | 0 | 1 | 0   | 1   | 0   | 0   | 1   | 1   | 1 | 1 | 1   | 1   | 0          | 0         | 0 |
| 0  | 1 | 1 | 0 | 1 | 1 | 1 |     |     | 0 | 0 | 0  | 1 | 1 | 0   | 1   | 0   | 0   | 1   | 0   | 0 | 1 | 1   | 1   | 0          | 0         | 0 |

|   |   |   |   |   |   |   |  |  |  |   |   |   |   |   |   |   |   |   |   |   |   |   |   |   |   |   |   |   |   |
|---|---|---|---|---|---|---|--|--|--|---|---|---|---|---|---|---|---|---|---|---|---|---|---|---|---|---|---|---|---|
| 1 | 1 | 1 | 0 | 1 | 0 | 1 |  |  |  | 1 | 0 | 1 | 0 | 1 | 0 | 1 | 0 | 0 | 1 | 1 | 1 | 0 |   | 0 |   | 0 |   | 0 |   |
| 1 | 1 | 0 | 0 | 1 | 0 | 1 |  |  |  | 0 | 1 | 1 | 0 | 1 | 0 | 1 | 0 | 0 | 1 | 1 | 0 | 1 | 0 |   | 0 |   | 0 |   | 0 |
| 1 | 0 | 1 | 0 | 1 | 1 | 1 |  |  |  | 1 | 1 | 1 | 0 | 1 | 0 | 0 | 0 | 0 | 0 | 1 | 0 | 1 | 1 |   | 0 |   | 0 |   | 0 |
| 1 | 0 | 1 | 0 | 1 | 0 | 1 |  |  |  | 1 | 0 | 1 | 0 | 1 | 0 | 1 | 0 | 0 | 0 | 0 | 1 | 1 | 0 |   | 1 |   | 0 |   | 1 |
| 0 | 1 | 1 | 1 | 1 | 0 | 1 |  |  |  | 1 | 0 | 1 | 0 | 1 | 0 | 1 | 0 | 0 | 1 | 0 | 1 | 1 |   |   |   | 0 |   | 0 |   |
| 1 | 0 | 1 | 1 | 1 | 0 | 1 |  |  |  | 1 | 0 | 1 | 0 | 1 |   | 1 | 1 | 1 |   |   | 0 | 0 | 1 |   |   |   | 0 |   |   |
| 1 | 1 | 1 | 1 | 0 | 0 | 1 |  |  |  | 0 | 0 | 0 | 1 | 1 | 0 | 1 | 0 | 1 |   |   | 1 | 1 | 1 |   |   |   | 0 |   |   |
| 1 | 1 | 1 | 1 | 1 | 0 | 1 |  |  |  | 1 | 0 | 1 | 0 | 1 | 1 | 1 | 0 |   |   |   | 1 | 1 | 1 |   |   |   | 0 |   |   |
| 1 | 1 | 0 | 1 | 1 | 0 | 1 |  |  |  | 0 | 0 | 0 | 1 | 0 | 0 | 1 | 0 | 1 | 1 | 1 | 1 | 1 |   |   |   | 0 |   | 0 |   |
| 0 | 1 | 0 | 1 | 1 | 0 | 1 |  |  |  | 1 | 0 | 1 | 0 | 1 | 0 | 1 | 0 | 1 | 0 |   | 1 | 1 |   |   |   | 0 |   |   |   |
| 1 | 1 | 1 | 0 | 1 | 0 | 1 |  |  |  | 0 | 0 | 0 | 1 | 1 |   | 0 | 0 | 1 |   |   | 0 | 1 |   |   |   | 0 |   |   |   |
| 1 | 0 | 1 | 0 | 1 | 1 | 1 |  |  |  | 0 | 0 | 0 | 1 | 1 | 0 | 1 | 0 | 1 |   |   | 0 | 1 |   |   |   | 0 |   |   |   |
| 0 | 1 | 0 | 1 | 1 | 0 | 1 |  |  |  | 0 | 0 | 0 | 1 | 1 | 0 | 1 | 0 | 1 |   |   | 0 | 0 | 1 |   |   | 0 |   |   |   |
| 1 | 1 | 0 | 0 | 1 | 0 | 1 |  |  |  | 1 | 0 | 1 | 0 | 1 | 0 | 0 | 0 | 0 | 0 | 0 | 0 | 0 | 1 |   |   | 0 |   | 1 |   |
| 1 | 1 | 1 | 1 | 0 | 0 | 1 |  |  |  | 0 | 0 | 0 | 1 | 1 | 0 | 1 | 0 | 1 | 1 | 1 | 1 |   |   |   | 0 |   | 0 |   | 0 |
| 1 | 1 | 1 | 0 | 1 | 0 | 1 |  |  |  | 0 | 1 | 1 | 0 | 1 | 0 | 0 | 0 | 1 | 0 | 0 | 0 | 0 | 0 |   | 0 |   | 0 |   | 1 |
| 1 | 1 | 0 | 0 | 1 | 1 | 1 |  |  |  | 1 | 0 | 1 | 0 | 1 | 0 | 0 | 0 | 1 | 0 | 0 | 0 | 1 | 0 |   | 0 |   | 0 |   | 1 |
| 1 | 1 | 1 | 0 | 1 | 0 | 1 |  |  |  | 0 | 0 | 0 | 1 | 1 | 0 | 0 | 0 | 1 | 0 | 0 | 0 | 1 | 0 |   | 0 |   | 0 |   | 1 |
| 1 | 0 | 1 | 1 | 1 | 0 | 1 |  |  |  | 1 | 0 | 1 | 0 | 1 | 0 | 1 | 0 | 1 | 0 | 0 | 0 | 1 | 0 |   | 1 |   | 0 |   | 1 |
| 0 | 1 | 0 | 0 | 1 | 0 | 1 |  |  |  | 1 | 1 | 1 | 0 | 1 | 0 | 0 | 0 | 1 | 0 | 0 | 1 | 1 | 0 |   | 1 |   | 0 |   | 1 |
| 1 | 0 | 1 | 0 | 1 | 1 | 1 |  |  |  | 0 | 1 | 1 | 0 | 1 | 0 | 0 | 0 | 0 | 0 | 0 | 0 | 0 | 1 |   | 0 |   | 0 |   | 1 |
| 1 | 0 | 1 | 0 | 1 | 0 | 1 |  |  |  | 0 | 0 | 0 | 1 | 1 | 0 | 0 | 0 | 0 | 0 | 0 | 0 | 1 | 1 |   | 0 |   | 1 |   | 0 |
| 1 | 1 | 0 | 0 | 1 | 0 | 1 |  |  |  | 0 | 0 | 0 | 1 | 1 | 0 | 0 | 0 | 0 | 0 | 0 | 0 | 1 | 1 |   | 0 |   | 0 |   | 1 |
| 1 | 0 | 1 | 1 | 1 | 0 | 1 |  |  |  | 1 | 0 | 1 | 0 | 1 | 0 | 1 | 0 | 1 | 0 | 0 | 0 | 1 | 0 |   | 0 |   | 0 |   | 1 |
| 1 | 1 | 1 | 1 | 1 | 0 | 1 |  |  |  | 0 | 1 | 1 | 0 | 1 | 0 | 0 | 0 | 1 | 0 | 0 | 0 | 1 | 0 |   | 0 |   | 0 |   | 1 |
| 1 | 0 | 1 | 0 | 1 | 0 | 1 |  |  |  | 0 | 0 | 0 | 1 | 1 | 0 | 0 | 0 | 1 | 0 | 0 | 1 | 1 | 0 |   | 1 |   | 0 |   | 1 |
| 1 | 1 | 0 | 0 | 1 | 0 | 1 |  |  |  | 1 | 0 | 1 | 0 | 1 | 0 | 0 | 0 | 1 | 0 | 0 | 0 | 1 | 0 |   | 1 |   | 0 |   | 1 |
| 1 | 0 | 0 | 0 | 1 | 0 | 1 |  |  |  | 1 | 0 | 1 | 0 | 1 | 0 | 0 | 0 | 0 | 0 | 0 | 1 | 1 | 0 |   | 0 |   | 0 |   | 1 |
| 1 | 1 | 0 | 0 | 1 | 1 | 0 |  |  |  | 1 | 1 | 1 | 0 | 1 | 0 | 1 | 0 | 0 | 0 | 0 | 0 | 1 | 1 |   | 0 |   | 0 |   | 1 |
| 1 | 1 | 0 | 0 | 1 | 0 | 1 |  |  |  | 0 | 0 | 0 | 1 | 1 | 0 | 1 | 0 | 0 | 0 | 0 | 0 | 1 | 0 |   | 0 |   | 0 |   | 1 |
| 1 | 1 | 0 | 0 | 1 | 0 | 1 |  |  |  | 0 | 0 | 0 | 1 | 1 | 0 | 0 | 0 | 1 | 0 | 0 | 1 | 1 | 0 |   | 0 |   | 0 |   | 1 |
| 1 | 0 | 1 | 1 | 1 | 0 | 1 |  |  |  | 0 | 1 | 1 | 0 | 1 | 0 | 1 | 0 | 1 | 0 | 0 | 0 | 1 | 0 |   | 0 |   | 0 |   | 1 |

|   |   |   |   |   |   |   |  |  |   |   |   |   |   |   |   |   |   |   |   |   |   |   |   |   |   |   |   |   |   |   |   |
|---|---|---|---|---|---|---|--|--|---|---|---|---|---|---|---|---|---|---|---|---|---|---|---|---|---|---|---|---|---|---|---|
| 1 | 1 | 1 | 0 | 1 | 0 | 1 |  |  | 1 | 0 | 1 | 0 | 1 | 1 | 1 | 0 | 0 | 0 | 0 | 0 | 1 | 1 | 0 |   | 0 |   | 0 |   | 1 |   |   |
| 1 | 1 | 1 | 1 | 1 | 0 | 1 |  |  | 0 | 1 | 1 | 0 | 1 | 0 | 1 | 0 | 1 | 0 | 0 | 0 | 0 | 0 | 0 | 0 |   | 0 |   | 1 |   | 1 |   |
| 0 | 1 | 1 | 1 | 1 | 0 | 1 |  |  | 1 | 0 | 1 | 0 | 1 | 0 | 1 | 0 | 1 | 1 | 0 | 1 | 1 | 0 |   | 0 |   | 0 |   | 0 |   | 0 |   |
| 1 | 0 | 1 | 0 | 1 | 0 | 1 |  |  | 0 | 0 | 0 | 1 | 1 | 0 | 1 | 0 | 1 | 0 | 0 | 1 | 1 | 0 |   | 0 |   | 0 |   | 0 |   | 1 |   |
| 1 | 0 | 1 | 1 | 1 | 0 | 1 |  |  | 0 | 0 | 0 | 1 | 1 | 0 | 0 | 0 | 0 | 0 | 0 | 0 | 0 | 1 | 1 |   | 1 |   | 0 |   | 1 |   |   |
| 1 | 0 | 1 | 1 | 1 | 0 | 1 |  |  | 0 | 0 | 0 | 1 | 1 | 0 | 0 | 0 | 1 | 0 | 0 | 0 | 1 | 0 |   | 0 |   | 0 |   | 0 |   | 1 |   |
| 1 | 1 | 1 | 1 | 1 | 0 | 1 |  |  | 1 | 0 | 1 | 0 | 1 | 0 | 1 | 0 | 0 | 0 | 0 | 0 | 0 | 1 | 0 |   | 1 |   | 0 |   | 1 |   |   |
| 0 | 0 | 1 | 0 | 1 | 0 | 1 |  |  | 1 | 0 | 1 | 0 | 1 | 0 | 1 | 0 | 0 | 0 | 0 | 0 | 0 | 1 | 1 |   | 0 |   | 0 |   | 1 |   |   |
| 1 | 1 | 1 | 0 | 1 | 1 | 1 |  |  | 0 | 0 | 0 | 1 | 1 | 0 | 0 | 0 | 0 | 0 | 0 | 0 | 0 | 1 | 0 |   | 0 |   | 0 |   | 1 |   |   |
| 0 | 1 | 1 | 1 | 1 | 0 | 1 |  |  | 0 | 0 | 0 | 1 | 1 | 1 | 0 | 0 | 0 | 0 | 0 | 0 | 0 | 1 | 0 |   | 1 |   | 0 |   | 1 |   |   |
| 1 | 1 | 1 | 1 | 1 | 0 | 1 |  |  | 0 | 0 | 0 | 1 | 1 | 0 | 1 | 0 | 0 | 0 | 0 | 0 | 0 | 1 | 0 |   | 1 |   | 0 |   | 1 |   |   |
| 1 | 1 | 1 | 0 | 1 | 0 | 1 |  |  | 1 | 0 | 1 | 0 | 1 | 0 | 0 | 0 | 0 | 0 | 0 | 0 | 1 | 1 | 0 |   | 0 |   | 0 |   | 1 |   |   |
| 1 | 1 | 0 | 0 | 1 | 0 | 1 |  |  | 0 | 0 | 0 | 1 | 1 | 0 | 0 | 0 | 0 | 0 | 0 | 0 | 0 | 1 | 0 |   | 1 |   | 0 |   | 1 |   |   |
| 1 | 1 | 1 | 1 | 1 | 0 | 1 |  |  | 0 | 0 | 0 | 1 | 1 | 0 | 0 | 0 | 0 | 0 | 0 | 0 | 0 | 1 | 0 |   | 0 |   | 0 |   | 1 |   |   |
| 1 | 1 | 1 | 1 | 0 | 0 | 1 |  |  | 1 | 0 | 1 | 0 | 1 | 0 | 0 | 0 | 0 | 0 | 0 | 0 | 0 | 1 | 1 |   | 0 |   | 0 |   | 1 |   |   |
| 1 | 1 | 1 | 0 | 1 | 0 | 1 |  |  | 0 | 0 | 0 | 1 | 1 | 0 | 1 | 0 | 0 | 0 | 0 | 0 | 1 | 1 | 0 |   | 1 |   | 0 |   | 1 |   |   |
| 1 | 1 | 1 | 0 | 1 | 0 | 1 |  |  | 1 | 0 | 1 | 0 | 1 | 0 | 0 | 0 | 0 | 0 | 0 | 0 | 1 | 1 | 0 |   | 1 |   | 0 |   | 1 |   |   |
| 0 | 1 | 1 | 0 | 1 | 1 | 1 |  |  | 0 | 1 | 1 | 0 | 1 | 0 | 1 | 0 | 0 | 0 | 0 | 0 | 0 | 1 | 0 |   | 1 |   | 0 |   | 1 |   |   |
| 1 | 1 | 1 | 0 | 1 | 0 | 1 |  |  | 0 | 1 | 1 | 0 | 1 | 0 | 0 | 0 | 0 | 0 | 0 | 0 | 0 | 0 | 0 |   | 0 |   | 0 |   | 1 |   |   |
| 1 | 1 | 1 | 0 | 1 | 0 | 1 |  |  | 0 | 0 | 0 | 1 | 1 | 0 | 1 | 0 | 0 | 0 | 0 | 0 | 0 | 0 | 0 |   | 1 |   | 0 |   | 1 |   |   |
| 1 | 1 | 1 | 0 | 1 | 0 | 1 |  |  | 0 | 1 | 1 | 0 | 1 | 0 | 0 | 0 | 0 | 0 | 0 | 0 | 0 | 1 | 0 |   | 0 |   | 0 |   | 1 |   |   |
| 0 | 1 | 1 | 0 | 1 | 0 | 1 |  |  | 0 | 0 | 0 | 1 | 1 | 0 | 1 | 0 | 0 | 1 | 0 | 0 | 1 | 0 |   | 1 |   | 0 |   | 0 |   | 0 |   |
| 1 | 1 | 1 | 1 | 1 | 0 | 1 |  |  | 1 | 0 | 1 | 0 | 1 | 0 | 0 | 0 | 0 | 0 | 0 | 0 | 1 | 1 | 1 |   | 0 |   | 0 |   | 1 |   |   |
| 1 | 1 | 0 | 0 | 1 | 0 | 1 |  |  | 0 | 0 | 0 | 1 | 1 | 0 | 1 | 1 | 0 | 0 | 0 | 0 | 1 | 0 |   | 0 |   | 0 |   | 0 |   | 1 |   |
| 1 | 1 | 1 | 0 | 1 | 0 | 1 |  |  | 1 | 1 | 1 | 0 | 1 | 0 | 1 | 0 | 0 | 0 | 0 | 0 | 0 | 1 | 0 |   | 0 |   | 0 |   | 1 |   |   |
| 1 | 1 | 1 | 1 | 1 | 0 | 1 |  |  | 0 | 0 | 0 | 1 | 1 | 0 | 1 | 0 | 1 | 0 | 0 | 1 | 1 | 1 |   | 0 |   | 0 |   | 0 |   | 1 |   |
| 1 | 1 | 1 | 0 | 1 | 0 | 1 |  |  | 0 | 0 | 0 | 1 | 1 | 0 | 1 | 0 | 1 | 0 | 0 | 1 | 1 | 0 |   | 1 |   | 0 |   | 0 |   | 1 |   |
| 1 | 1 | 1 | 0 | 1 | 0 | 1 |  |  | 0 | 1 | 1 | 0 | 1 | 0 | 1 | 0 | 0 | 0 | 0 | 0 | 1 | 0 |   | 0 |   | 0 |   | 0 |   | 1 |   |
| 0 | 1 | 1 | 0 | 1 | 0 | 1 |  |  | 0 | 0 | 0 | 1 | 1 | 0 | 1 | 0 | 0 | 0 | 1 | 0 | 1 | 0 |   | 1 |   | 0 |   | 0 |   | 0 |   |
| 1 | 1 | 1 | 0 | 1 | 0 | 1 |  |  | 1 | 0 | 1 | 0 | 1 | 0 | 1 | 0 | 0 | 0 | 0 | 0 | 1 | 1 | 0 |   | 1 |   | 0 |   | 0 |   | 1 |

|   |   |   |   |   |   |   |  |  |   |   |   |   |   |   |   |   |   |   |   |   |   |   |   |   |
|---|---|---|---|---|---|---|--|--|---|---|---|---|---|---|---|---|---|---|---|---|---|---|---|---|
| 0 | 1 | 0 | 0 | 1 | 0 | 1 |  |  | 1 | 0 | 1 | 0 | 1 | 0 | 0 | 1 | 0 | 1 | 1 | 0 | 0 | 0 | 0 |   |
| 0 | 1 | 0 | 0 | 1 | 0 | 1 |  |  | 0 | 0 | 0 | 1 | 1 | 0 | 0 | 0 | 1 | 0 | 0 | 1 | 1 | 0 | 0 | 1 |
| 1 | 1 | 0 | 0 | 1 | 0 | 1 |  |  | 1 | 0 | 1 | 0 | 1 | 1 | 0 | 0 | 0 | 0 | 1 | 1 | 0 | 0 | 0 | 1 |
| 0 | 0 | 1 | 0 | 1 | 0 | 1 |  |  | 1 | 0 | 1 | 0 | 1 | 0 | 1 | 0 | 0 | 0 | 0 | 1 | 0 | 0 | 0 | 1 |
| 0 | 1 | 0 | 0 | 1 | 1 | 1 |  |  | 1 | 1 | 1 | 0 | 1 | 0 | 0 | 0 | 0 | 0 | 0 | 1 | 0 | 0 | 0 | 1 |
| 0 | 1 | 1 | 0 | 1 | 0 | 1 |  |  | 0 | 0 | 0 | 1 | 1 | 0 | 1 | 0 | 0 | 0 | 0 | 1 | 0 | 0 | 0 | 1 |
| 0 | 1 | 1 | 0 | 1 | 1 | 1 |  |  | 0 | 0 | 0 | 1 | 1 | 0 | 0 | 0 | 0 | 0 | 1 | 0 | 1 | 0 | 0 | 0 |
| 0 | 1 | 0 | 1 | 1 | 1 | 1 |  |  | 1 | 0 | 1 | 0 | 1 | 0 | 0 | 0 | 0 | 0 | 0 | 1 | 1 | 0 | 0 | 1 |
| 0 | 0 | 1 | 1 | 0 | 0 | 1 |  |  | 1 | 0 | 1 | 0 | 1 | 0 | 1 | 0 | 1 | 1 | 0 | 0 | 1 | 0 | 0 | 0 |
| 0 | 1 | 1 | 0 | 1 | 0 | 1 |  |  | 1 | 0 | 1 | 0 | 1 | 0 | 0 | 0 | 0 | 0 | 0 | 1 | 1 | 1 | 0 | 1 |
| 0 | 1 | 1 | 0 | 1 | 0 | 0 |  |  | 0 | 1 | 1 | 0 | 1 | 1 | 0 | 0 | 0 | 0 | 0 | 1 | 0 | 0 | 0 | 1 |
| 0 | 1 | 1 | 0 | 1 | 0 | 1 |  |  | 1 | 0 | 1 | 0 | 1 | 1 | 0 | 0 | 0 | 0 | 0 | 1 | 1 | 1 | 0 | 1 |
| 0 | 1 | 0 | 0 | 1 | 0 | 1 |  |  | 0 | 0 | 0 | 1 | 1 | 0 | 1 | 0 | 0 | 0 | 0 | 1 | 1 | 0 | 1 | 1 |
| 1 | 1 | 1 | 0 | 1 | 0 | 1 |  |  | 0 | 1 | 1 | 0 | 1 |   |   |   |   |   |   |   |   |   |   |   |
| 1 | 1 | 0 | 1 | 1 | 1 | 1 |  |  | 1 | 0 | 1 | 0 | 1 | 0 | 0 | 0 | 0 | 1 | 0 | 1 | 0 | 0 | 0 | 0 |
| 1 | 0 | 1 | 1 | 1 | 0 | 1 |  |  | 1 | 0 | 1 | 0 | 1 | 0 | 0 | 0 | 0 | 0 | 0 | 1 | 0 | 0 | 0 | 1 |
| 1 | 1 | 1 | 0 | 1 | 0 | 1 |  |  | 0 | 1 | 1 | 0 | 1 | 0 | 1 | 0 | 0 | 0 | 1 | 1 | 1 | 0 | 0 | 0 |
| 1 | 1 | 0 | 0 | 1 | 0 | 1 |  |  | 0 | 0 | 0 | 1 | 1 | 0 | 1 | 0 | 0 | 0 | 0 | 1 | 1 | 0 | 0 | 1 |
| 1 | 0 | 1 | 0 | 1 | 1 | 1 |  |  | 0 | 1 | 1 | 0 | 1 | 0 | 0 | 0 | 0 | 0 | 0 | 1 | 1 | 0 | 0 | 1 |
| 1 | 1 | 1 | 0 | 1 | 0 | 1 |  |  | 1 | 0 | 1 | 0 | 1 | 0 | 1 | 0 | 0 | 0 | 0 | 1 | 1 | 0 | 0 | 1 |
| 1 | 1 | 1 | 0 | 1 | 0 | 1 |  |  | 1 | 1 | 1 | 0 | 1 | 0 | 1 | 0 | 0 | 0 | 0 | 1 | 1 | 0 | 0 | 1 |
| 1 | 1 | 0 | 0 | 1 | 0 | 1 |  |  | 1 | 0 | 1 | 0 | 1 | 0 | 0 | 0 | 0 | 0 | 0 | 1 | 0 | 0 | 0 | 1 |
| 1 | 1 | 0 | 0 | 1 | 0 | 1 |  |  | 1 | 0 | 1 | 0 | 1 | 0 | 0 | 0 | 0 | 0 | 0 | 1 | 0 | 0 | 0 | 1 |
| 1 | 1 | 0 | 1 | 1 | 0 | 1 |  |  | 0 | 0 | 0 | 1 | 1 | 0 |   | 0 | 0 | 0 | 0 | 0 | 0 | 1 | 0 | 1 |
| 0 | 1 | 0 | 0 | 1 | 1 | 1 |  |  | 1 | 0 | 1 | 0 | 1 | 0 | 0 | 0 | 0 | 0 | 0 | 1 | 0 | 0 | 0 | 1 |
| 1 | 1 | 1 | 0 | 1 | 1 | 1 |  |  | 1 | 0 | 1 | 0 | 1 | 0 | 0 | 0 | 0 | 0 | 0 | 1 | 0 | 0 | 0 | 1 |
| 1 | 1 | 1 | 0 | 1 | 0 | 1 |  |  | 0 | 0 | 0 | 1 | 1 | 0 | 0 |   | 0 | 0 | 0 | 0 | 1 | 0 | 0 | 1 |
| 1 | 1 | 1 | 0 | 1 | 1 | 1 |  |  | 0 | 0 | 0 | 1 | 1 | 0 | 0 | 0 | 0 | 0 | 0 | 1 | 0 | 0 | 0 | 1 |
| 1 | 1 | 1 | 0 | 1 | 1 | 1 |  |  | 0 | 0 | 0 | 1 | 1 | 0 | 0 | 0 | 0 | 0 | 0 | 1 | 1 | 1 | 0 | 1 |

|   |   |   |   |   |   |   |  |  |   |   |   |   |   |   |   |   |   |   |   |   |   |   |   |   |   |
|---|---|---|---|---|---|---|--|--|---|---|---|---|---|---|---|---|---|---|---|---|---|---|---|---|---|
| 1 | 1 | 1 | 0 | 1 | 0 | 1 |  |  | 0 | 0 | 0 | 1 | 1 | 0 | 0 | 0 | 0 | 0 | 0 | 1 | 1 | 1 | 0 | 0 | 1 |
| 1 | 1 | 0 | 0 | 1 | 1 | 1 |  |  | 1 | 1 | 1 | 0 | 1 | 0 | 0 | 1 | 0 | 0 | 0 | 1 | 1 | 0 | 0 | 0 | 1 |
| 1 | 1 | 1 | 1 | 1 | 0 | 1 |  |  | 0 | 0 | 0 | 1 | 1 | 0 | 1 | 0 | 0 | 0 | 0 | 1 | 1 | 1 | 1 | 1 | 0 |
| 1 | 1 | 1 | 1 | 1 | 0 | 1 |  |  | 0 | 0 | 0 | 1 | 1 | 0 | 0 | 0 | 0 | 0 | 0 | 1 | 1 | 0 | 1 | 0 | 1 |
| 1 | 1 | 0 | 0 | 1 | 0 | 1 |  |  | 1 | 0 | 1 | 0 | 1 | 0 | 1 | 0 | 0 | 0 | 0 | 0 | 1 | 0 | 1 | 0 | 1 |
| 1 | 1 | 0 | 0 | 1 | 0 | 1 |  |  | 0 | 0 | 0 | 1 | 1 | 0 | 1 | 0 | 0 | 0 | 0 | 1 | 1 | 0 | 1 | 0 | 1 |
| 1 | 1 | 1 | 1 | 1 | 0 | 1 |  |  | 0 | 0 | 0 | 1 | 1 | 0 | 1 | 0 | 0 | 0 | 0 | 0 | 1 | 1 | 1 | 0 | 1 |
| 1 | 1 | 1 | 0 | 1 | 0 | 1 |  |  | 1 | 0 | 1 | 0 | 1 | 0 | 0 | 0 | 1 | 0 | 0 | 1 | 1 | 1 | 0 | 0 | 1 |
| 1 | 1 | 0 | 1 | 1 | 0 | 1 |  |  | 0 | 0 | 0 | 1 | 1 | 0 | 0 | 0 | 0 | 0 | 0 | 1 | 1 | 0 | 0 | 0 | 1 |
| 1 | 1 | 0 | 1 | 1 | 0 | 1 |  |  | 0 | 0 | 0 | 1 | 1 | 0 | 1 | 0 | 0 | 0 | 0 | 1 | 1 | 0 | 0 | 0 | 1 |
| 0 | 1 | 0 | 0 | 1 | 0 | 1 |  |  | 0 | 0 | 0 | 1 | 1 | 0 | 1 | 0 | 0 | 0 | 0 | 1 | 1 | 0 | 1 | 0 | 1 |
| 1 | 0 | 1 | 0 | 1 | 0 | 1 |  |  | 1 | 0 | 1 | 0 | 1 | 0 | 0 | 0 | 1 | 0 | 0 | 0 | 1 | 0 | 1 | 0 | 1 |
| 0 | 1 | 0 | 0 | 1 | 1 | 1 |  |  | 1 | 0 | 1 | 0 | 1 | 0 | 0 | 0 | 0 | 0 | 0 | 0 | 1 | 0 | 1 | 0 | 1 |
| 1 | 1 | 1 | 0 | 1 | 0 | 1 |  |  | 0 | 0 | 0 | 1 | 1 | 0 | 1 | 0 | 0 | 0 | 0 | 1 | 1 | 0 | 1 | 0 | 1 |
| 1 | 1 | 1 | 1 | 0 | 0 | 1 |  |  | 1 | 1 | 1 | 0 | 1 | 0 | 1 | 0 | 0 | 1 | 0 | 0 | 1 | 0 | 0 | 0 | 0 |
| 1 | 1 | 1 | 0 | 1 | 0 | 1 |  |  | 0 | 1 | 1 | 0 | 1 | 0 | 1 | 0 | 0 | 0 | 0 | 0 | 1 | 0 | 0 | 0 | 1 |
| 1 | 1 | 1 | 1 | 1 | 0 | 1 |  |  | 1 | 0 | 1 | 0 | 1 | 0 | 1 | 0 | 0 | 0 | 0 | 0 | 1 | 0 | 0 | 0 | 1 |
| 0 | 1 | 0 | 0 | 1 | 0 | 1 |  |  | 1 | 0 | 1 | 0 | 1 | 0 | 1 | 0 | 0 | 0 | 0 | 0 | 1 | 0 | 1 | 0 | 1 |
| 0 | 1 | 0 | 1 | 1 | 0 | 1 |  |  | 0 | 1 | 1 | 0 | 1 | 0 | 1 | 0 | 0 | 0 | 0 | 0 | 1 | 0 | 0 | 0 | 1 |
| 1 | 0 | 1 | 0 | 1 | 1 | 0 |  |  | 1 | 0 | 1 | 0 | 1 | 0 | 1 | 0 | 0 | 0 | 0 | 0 | 1 | 0 | 1 | 0 | 1 |
| 1 | 1 | 0 | 1 | 0 | 0 | 1 |  |  | 1 | 0 | 1 | 0 | 1 | 0 | 1 | 0 | 0 | 0 | 0 | 0 | 1 | 0 | 0 | 0 | 1 |
| 1 | 1 | 1 | 0 | 1 | 0 | 1 |  |  | 0 | 1 | 1 | 0 | 1 | 0 | 0 | 0 | 0 | 0 | 0 | 0 | 1 | 0 | 0 | 0 | 1 |
| 0 | 1 | 0 | 0 | 0 | 0 | 1 |  |  | 0 | 0 | 0 | 1 | 1 | 0 | 0 | 0 | 0 | 0 | 0 | 1 | 1 | 0 | 0 | 0 | 1 |
| 1 | 1 | 1 | 0 | 1 | 0 | 1 |  |  | 0 | 0 | 0 | 1 | 1 | 0 | 0 | 0 | 1 | 0 | 0 | 0 | 1 | 0 | 0 | 0 | 1 |
| 1 |   | 1 | 0 | 1 | 0 | 1 |  |  | 0 | 0 | 0 | 1 | 1 | 0 | 0 |   | 1 | 0 | 0 | 0 | 1 | 0 | 0 | 0 | 1 |
| 1 | 0 | 1 | 0 | 1 | 1 | 1 |  |  | 0 | 0 | 0 | 1 | 1 | 0 | 0 | 0 | 0 | 0 | 0 | 0 | 1 | 0 | 0 | 0 | 1 |
| 0 | 1 | 0 | 0 | 1 | 1 | 1 |  |  | 1 | 0 | 1 | 0 | 1 | 0 | 0 | 0 | 0 | 0 | 0 | 0 | 1 | 0 | 0 | 0 | 1 |
| 0 | 1 | 1 | 0 | 1 | 0 | 1 |  |  | 0 | 1 | 1 | 0 | 1 | 0 | 0 | 0 | 0 | 0 | 0 | 1 | 0 | 0 | 0 | 0 | 1 |
| 1 |   | 1 | 0 | 1 | 0 | 1 |  |  | 0 | 0 | 0 | 1 | 1 | 0 | 0 | 0 | 1 | 0 | 0 | 0 | 1 | 0 | 0 | 0 | 1 |
| 0 | 1 | 1 | 0 | 1 | 0 | 1 |  |  | 1 | 0 | 1 | 0 | 1 | 0 | 0 | 0 | 1 | 0 | 0 | 1 | 1 | 0 | 0 | 0 | 1 |
| 1 | 1 | 1 | 0 | 1 | 0 | 1 |  |  | 0 | 0 | 0 | 1 | 1 | 0 | 0 | 0 | 1 | 0 | 0 | 0 | 1 | 0 | 1 | 0 | 1 |
| 0 | 1 | 0 | 0 | 1 | 0 | 1 |  |  | 0 | 0 | 0 | 1 | 1 | 0 | 0 | 0 | 0 | 0 | 0 | 1 | 0 | 1 | 0 | 0 | 1 |
| 0 | 1 | 0 | 1 | 1 | 0 | 1 |  |  | 0 | 0 | 0 | 1 | 1 | 0 | 0 | 0 | 1 | 0 | 0 | 0 | 1 | 0 | 0 | 0 | 1 |

|   |   |   |   |   |   |   |  |  |   |   |   |   |   |   |   |   |   |   |   |   |   |   |   |   |   |   |   |   |   |   |   |
|---|---|---|---|---|---|---|--|--|---|---|---|---|---|---|---|---|---|---|---|---|---|---|---|---|---|---|---|---|---|---|---|
| 0 | 1 | 0 | 1 | 1 | 0 | 1 |  |  | 1 | 0 | 1 | 0 | 1 | 0 | 0 | 0 | 1 | 0 | 0 | 0 | 1 | 0 | 0 | 0 | 1 | 0 | 0 | 0 | 1 |   |   |
| 0 | 1 | 0 | 0 | 1 | 0 | 1 |  |  | 1 | 1 | 1 | 0 | 1 | 0 | 0 | 0 | 1 | 0 | 0 | 0 | 1 | 0 | 0 | 0 | 1 | 0 | 0 | 0 | 0 | 1 |   |
| 1 | 1 | 0 | 0 | 1 | 0 | 1 |  |  | 0 | 0 | 0 | 1 | 1 | 0 | 1 | 0 | 1 | 0 | 0 | 0 | 1 | 0 | 0 | 0 | 1 | 0 | 1 | 0 | 1 | 0 | 1 |
| 1 | 1 | 1 | 1 | 1 | 0 | 1 |  |  | 1 | 0 | 1 | 0 | 1 | 0 | 0 | 0 | 1 | 0 | 0 | 0 | 1 | 0 | 0 | 0 | 1 | 0 | 0 | 0 | 0 | 1 |   |
| 1 | 1 | 0 | 0 | 1 | 0 | 1 |  |  | 0 | 0 | 0 | 1 | 1 | 0 | 0 | 0 | 1 | 0 | 0 | 0 | 0 | 0 | 0 | 0 | 0 | 0 | 0 | 0 | 0 | 1 |   |
| 1 | 1 | 1 | 0 | 1 | 1 | 1 |  |  | 0 | 1 | 1 | 0 | 1 | 0 | 0 | 0 | 1 | 1 | 0 | 0 | 0 | 0 | 0 | 0 | 0 | 0 | 0 | 0 | 0 | 0 |   |
| 1 | 1 | 1 | 0 | 1 | 0 | 1 |  |  | 1 | 0 | 1 | 0 | 1 | 0 | 0 | 0 | 1 | 0 | 0 | 0 | 0 | 0 | 0 | 0 | 0 | 0 | 1 | 0 | 0 | 1 |   |
| 0 | 1 | 1 | 1 | 1 | 0 | 1 |  |  | 0 | 1 | 1 | 0 | 1 | 0 | 0 | 0 | 1 | 0 | 0 | 0 | 1 | 0 | 0 | 0 | 1 | 0 | 0 | 0 | 0 | 1 |   |
| 0 | 1 | 1 | 0 | 1 | 1 | 1 |  |  | 1 | 0 | 1 | 0 | 1 | 0 | 0 | 0 | 0 | 0 | 0 | 0 | 0 | 0 | 0 | 0 | 1 | 0 | 0 | 0 | 0 | 1 |   |
| 0 | 1 | 1 | 0 | 1 | 0 | 1 |  |  | 0 | 0 | 0 | 1 | 1 | 0 | 1 | 0 | 0 | 1 | 0 | 0 | 0 | 1 | 0 | 0 | 1 | 0 | 0 | 0 | 0 | 0 |   |
| 1 | 1 | 0 | 0 | 1 | 0 | 1 |  |  | 1 | 0 | 1 | 0 | 1 | 0 | 0 | 0 | 1 | 0 | 0 | 0 | 1 | 0 | 0 | 0 | 1 | 0 | 0 | 0 | 0 | 1 |   |
| 1 |   | 1 | 1 | 1 | 0 | 1 |  |  | 0 | 0 | 0 | 1 | 1 | 0 | 0 | 0 | 1 | 0 | 0 | 0 | 1 | 0 | 0 | 0 | 1 | 0 | 1 | 0 | 0 | 1 |   |
| 1 | 1 | 1 | 0 | 1 | 0 | 1 |  |  | 0 | 1 | 1 | 0 | 0 | 0 | 0 | 0 | 1 | 0 | 0 | 0 | 1 | 0 | 0 | 0 | 1 | 0 | 0 | 1 | 1 | 1 |   |
| 1 | 1 | 0 | 0 | 1 | 1 | 1 |  |  | 0 | 1 | 1 | 0 | 1 | 0 | 1 | 0 | 1 | 0 | 0 | 0 | 0 | 0 | 0 | 0 | 1 | 0 | 0 | 0 | 0 | 1 |   |
| 0 | 0 | 1 | 0 | 1 | 0 | 1 |  |  | 0 | 0 | 0 | 1 | 1 | 0 | 1 | 0 | 0 | 0 | 0 | 0 | 0 | 0 | 0 | 0 | 1 | 1 | 0 | 0 | 0 | 1 |   |
| 0 | 0 | 1 | 0 | 1 | 0 | 1 |  |  | 1 | 0 | 1 | 0 | 1 | 0 | 0 | 0 | 0 | 0 | 0 | 0 | 0 | 0 | 0 | 0 | 0 | 0 | 0 | 0 | 0 | 1 |   |
| 0 | 1 | 0 | 0 | 1 | 1 | 1 |  |  | 0 | 1 | 1 | 0 | 1 | 0 | 0 | 0 | 0 | 0 | 0 | 0 | 0 | 0 | 0 | 1 | 0 | 0 | 0 | 0 | 0 | 1 |   |
| 1 | 0 | 1 | 0 | 1 | 0 | 1 |  |  | 1 | 0 | 1 | 0 | 1 | 0 | 1 | 0 | 0 | 0 | 0 | 1 | 0 | 1 | 0 | 1 | 0 | 0 | 0 | 0 | 0 | 0 |   |
| 1 | 1 | 0 | 0 | 1 | 1 | 1 |  |  | 1 | 0 | 1 | 0 | 1 | 0 | 0 | 0 | 0 | 0 | 0 | 0 | 0 | 0 | 0 | 0 | 1 | 1 | 0 | 0 | 0 | 1 |   |
| 1 | 1 | 1 | 1 | 1 | 1 | 1 |  |  | 0 | 0 | 0 | 1 | 1 | 0 | 0 | 0 | 0 | 0 | 0 | 0 | 0 | 0 | 0 | 1 | 0 | 1 | 0 | 1 | 0 | 1 |   |
| 0 | 1 | 1 | 0 | 1 | 0 | 1 |  |  | 0 | 0 | 0 | 1 | 1 | 0 | 1 | 0 | 1 | 0 | 1 | 0 | 0 | 0 | 1 | 0 | 1 | 0 | 1 | 0 | 1 | 0 | 1 |
| 1 | 1 | 0 | 0 | 1 | 0 | 1 |  |  | 0 | 1 | 1 | 0 | 1 | 0 | 0 | 0 | 1 | 0 | 0 | 0 | 1 | 0 | 0 | 0 | 1 | 1 | 0 | 0 | 0 | 1 |   |
| 1 | 0 | 1 | 0 | 1 | 1 | 1 |  |  | 1 | 0 | 1 | 0 | 1 | 0 | 0 | 0 | 0 | 0 | 0 | 0 | 0 | 0 | 0 | 0 | 1 | 0 | 0 | 0 | 0 | 1 |   |
| 1 | 0 | 1 | 0 | 1 | 0 | 1 |  |  | 0 | 1 | 1 | 0 | 1 | 0 | 1 | 0 | 0 | 0 | 0 | 0 | 0 | 0 | 0 | 0 | 1 | 0 | 1 | 0 | 1 | 0 | 1 |
| 1 | 1 | 1 | 0 | 1 | 0 | 1 |  |  | 1 | 0 | 1 | 0 | 0 | 0 | 1 | 0 | 0 | 0 | 0 | 0 | 0 | 0 | 0 | 0 | 1 | 0 | 1 | 0 | 1 | 0 | 1 |
| 1 | 1 | 0 | 0 | 1 | 0 | 1 |  |  | 1 | 0 | 1 | 0 | 1 | 0 | 1 | 0 | 0 | 0 | 0 | 0 | 0 | 0 | 0 | 0 | 1 | 0 | 1 | 0 | 1 | 0 | 1 |
| 1 | 1 | 0 | 0 | 1 | 0 | 1 |  |  | 0 | 1 | 1 | 0 | 1 | 0 | 1 | 0 | 0 | 0 | 0 | 0 | 0 | 0 | 0 | 1 | 0 | 0 | 0 | 0 | 0 | 1 |   |
| 1 | 1 | 0 | 1 | 1 | 1 | 1 |  |  | 1 | 1 | 1 | 0 | 1 | 0 | 1 | 0 | 0 | 0 | 0 | 0 | 0 | 0 | 0 | 1 | 1 | 0 | 1 | 0 | 1 | 0 | 1 |
| 1 | 1 | 1 | 1 | 1 | 0 | 1 |  |  | 1 | 0 | 1 | 0 | 1 | 0 | 1 | 0 | 0 | 0 | 0 | 0 | 0 | 0 | 0 | 0 | 1 | 1 | 1 | 0 | 0 | 0 | 1 |

|   |   |   |   |   |   |   |  |  |   |   |   |   |   |   |   |   |   |   |   |   |   |   |   |   |   |   |   |   |   |   |
|---|---|---|---|---|---|---|--|--|---|---|---|---|---|---|---|---|---|---|---|---|---|---|---|---|---|---|---|---|---|---|
| 1 | 1 | 1 | 0 | 1 | 0 | 1 |  |  | 0 | 0 | 0 | 1 | 1 | 0 | 0 | 0 | 0 | 0 | 0 | 0 | 1 | 1 | 0 |   | 0 |   | 0 |   | 1 |   |
| 1 | 1 | 1 | 1 | 1 | 1 | 1 |  |  | 1 | 1 | 1 | 0 | 1 | 0 | 1 | 0 | 0 | 1 | 0 | 0 | 1 | 0 | 0 | 0 |   | 0 |   | 0 |   | 0 |
| 1 | 1 | 1 | 1 | 1 | 0 | 1 |  |  | 1 | 1 | 1 | 0 | 1 | 0 | 1 | 0 | 0 | 0 | 0 | 0 | 0 | 1 | 0 |   | 1 |   | 0 |   | 1 |   |
| 1 | 0 | 1 | 0 | 1 | 0 | 1 |  |  | 0 | 1 | 1 | 0 | 1 | 0 | 1 | 0 | 0 | 0 | 0 | 0 | 0 | 1 | 0 |   | 1 |   | 0 |   | 1 |   |
| 1 | 1 | 1 | 1 | 1 | 1 | 1 |  |  | 1 | 0 | 1 | 0 | 1 | 0 | 1 | 0 | 0 | 0 | 0 | 0 | 0 | 1 | 0 |   | 0 |   | 0 |   | 1 |   |
| 1 | 1 | 1 | 1 | 1 | 0 | 1 |  |  | 1 | 1 | 1 | 0 | 1 | 0 | 1 | 0 | 0 | 0 | 0 | 0 | 0 | 1 | 1 |   | 0 |   | 0 |   | 1 |   |
| 1 | 1 | 1 | 0 | 1 | 0 | 1 |  |  | 1 | 0 | 1 | 0 | 1 | 0 | 1 | 0 | 1 | 0 | 0 | 0 | 0 | 1 | 0 |   | 0 |   | 0 |   | 1 |   |
| 1 | 1 | 0 | 1 | 1 | 0 | 1 |  |  | 1 | 0 | 1 | 0 | 1 | 0 | 1 | 0 | 0 | 0 | 0 | 0 | 0 | 1 | 1 |   | 0 |   | 0 |   | 1 |   |
| 1 | 1 | 0 | 1 | 1 | 0 | 1 |  |  | 0 | 0 | 0 | 1 | 1 | 0 | 1 | 0 | 0 | 0 | 0 | 1 | 0 | 1 | 0 |   | 0 |   | 0 |   | 0 |   |
| 1 | 1 | 0 | 0 | 1 | 0 | 1 |  |  | 1 | 0 | 1 | 0 | 1 | 0 | 1 | 0 | 0 | 0 | 0 | 0 | 0 | 1 | 0 |   | 1 |   | 0 |   | 1 |   |
| 1 | 1 | 1 | 0 | 1 | 1 | 1 |  |  | 0 | 0 | 0 | 1 | 1 | 0 | 1 | 0 | 0 | 0 | 0 | 1 | 1 | 1 | 0 |   | 1 |   | 0 |   | 0 |   |
| 0 | 1 | 0 | 1 | 1 | 1 | 1 |  |  | 0 | 0 | 0 | 1 | 1 | 0 | 1 | 0 | 0 | 0 | 0 | 1 | 0 | 1 | 0 |   | 1 |   | 0 |   | 0 |   |
| 1 | 0 | 1 | 1 | 1 | 0 | 1 |  |  | 0 | 0 | 0 | 1 | 1 | 0 | 1 | 0 | 0 | 1 | 0 | 0 | 1 | 0 | 0 |   | 1 |   | 0 |   | 0 |   |
| 0 | 1 | 1 | 0 | 1 | 0 | 1 |  |  | 1 | 0 | 1 | 0 | 1 | 0 | 0 | 0 | 0 | 0 | 0 | 0 | 0 | 1 | 0 |   | 0 |   | 0 |   | 1 |   |
| 0 | 1 | 0 | 0 | 1 | 0 | 1 |  |  | 1 | 0 | 1 | 0 | 1 | 0 | 1 | 0 | 0 | 0 | 0 | 0 | 0 | 1 | 0 |   | 0 |   | 0 |   | 1 |   |
| 1 | 1 | 0 | 0 | 1 | 0 | 1 |  |  | 0 | 0 | 0 | 1 | 1 | 0 | 1 | 0 | 0 | 0 | 0 | 0 | 0 | 1 | 0 |   | 1 |   | 0 |   | 1 |   |
| 1 | 1 | 0 | 0 | 1 | 0 | 1 |  |  | 0 | 0 | 0 | 1 | 1 | 0 | 1 | 0 | 1 | 0 | 0 | 1 | 0 | 1 | 0 |   | 0 |   | 0 |   | 1 |   |
|   | 1 | 1 | 0 | 1 | 0 | 1 |  |  | 0 | 0 | 0 | 1 | 1 | 0 | 1 | 0 | 1 | 0 | 1 | 0 | 0 | 0 | 1 |   | 0 |   | 0 |   | 1 |   |
|   | 1 | 1 | 0 | 1 | 0 | 1 |  |  | 1 | 1 | 1 | 0 | 0 | 0 | 1 | 0 | 1 | 0 | 1 | 0 | 0 | 0 | 0 |   | 0 |   | 0 |   | 1 |   |
|   | 1 | 1 | 0 | 1 | 1 | 1 |  |  | 0 | 1 | 1 | 0 | 1 | 0 | 1 | 0 | 1 | 0 | 0 | 0 | 0 | 0 | 1 |   | 0 |   | 0 |   | 1 |   |
|   | 1 | 0 | 0 | 1 | 0 | 1 |  |  | 0 | 1 | 1 | 0 | 1 | 0 | 1 | 0 | 0 | 0 | 0 | 0 | 0 | 1 | 1 |   | 0 |   | 0 |   | 1 |   |
|   | 1 | 1 | 1 | 1 | 1 | 1 |  |  | 1 | 1 | 1 | 0 | 1 | 0 | 1 | 0 | 0 | 0 | 0 | 0 | 0 | 1 | 0 |   | 1 |   | 0 |   | 1 |   |
|   | 0 | 1 | 0 | 1 | 0 | 1 |  |  | 0 | 0 | 0 | 1 | 1 | 0 | 1 | 0 | 1 | 0 | 1 | 0 | 0 | 1 | 0 |   | 1 |   | 0 |   | 1 |   |
|   | 0 | 1 | 0 | 1 | 1 | 1 |  |  | 1 | 0 | 1 | 0 | 1 | 0 | 1 | 0 | 0 | 0 | 0 | 0 | 1 | 0 | 1 |   | 1 |   | 0 |   | 1 |   |
|   | 1 | 1 | 0 | 1 | 0 | 1 |  |  | 1 | 0 | 1 | 0 | 1 | 0 | 1 | 0 | 1 | 0 | 0 | 0 | 1 | 1 | 0 |   | 1 |   | 0 |   | 1 |   |
|   | 1 | 1 | 0 | 1 | 0 | 1 |  |  | 1 | 0 | 1 | 0 | 1 | 0 | 1 | 0 | 1 | 0 | 0 | 0 | 0 | 0 | 0 |   | 0 |   | 0 |   | 1 |   |
|   | 1 | 1 | 0 | 1 | 0 | 1 |  |  | 0 | 0 | 0 | 1 | 1 | 0 | 1 | 0 | 0 | 0 | 0 | 1 | 1 | 0 | 0 |   | 1 |   | 0 |   | 0 |   |
|   | 1 | 1 | 0 | 1 | 0 | 1 |  |  | 0 | 0 | 0 | 1 | 0 | 0 | 1 | 0 | 0 |   |   |   |   |   | 0 |   | 0 |   | 0 |   |   |   |
|   | 1 | 1 | 0 | 1 | 0 | 1 |  |  | 0 | 0 | 0 | 1 | 1 | 0 | 1 | 0 | 0 |   |   |   |   |   | 0 |   | 1 |   | 0 |   |   |   |
|   | 0 | 1 | 0 | 1 | 0 | 1 |  |  | 0 | 0 | 0 | 1 | 1 | 0 | 1 | 0 | 0 |   |   |   |   |   | 1 |   | 0 |   | 0 |   |   |   |
|   | 1 | 0 | 0 | 1 | 0 | 1 |  |  | 1 | 0 | 1 | 0 | 1 | 0 | 1 | 0 | 0 |   |   |   |   |   | 0 |   | 0 |   | 0 |   |   |   |
|   | 0 | 1 | 0 | 1 | 0 | 1 |  |  | 1 | 0 | 1 | 0 | 1 | 0 | 1 | 0 | 0 |   |   |   |   |   | 0 |   | 1 |   | 0 |   |   |   |
|   | 1 | 0 | 1 | 1 | 1 | 1 |  |  | 0 | 0 | 0 | 1 | 1 | 0 | 1 | 0 | 0 |   |   |   |   |   | 0 |   | 1 |   | 0 |   |   |   |

|   |   |   |   |   |   |   |  |  |   |   |   |   |   |   |   |   |   |   |   |   |   |   |   |   |   |
|---|---|---|---|---|---|---|--|--|---|---|---|---|---|---|---|---|---|---|---|---|---|---|---|---|---|
|   | 1 | 1 | 1 | 1 | 0 | 1 |  |  | 0 | 0 | 0 | 1 | 1 | 0 | 1 | 0 | 0 |   |   |   |   | 0 | 1 | 0 |   |
|   | 0 | 1 | 0 | 1 | 0 | 1 |  |  | 1 | 1 | 1 | 0 | 1 | 0 | 1 | 0 | 0 |   |   |   |   | 0 | 0 | 0 |   |
|   | 1 | 1 | 0 | 1 | 1 | 1 |  |  | 0 | 0 | 0 | 1 | 1 | 0 | 1 | 0 | 0 |   |   |   |   | 0 | 0 | 0 |   |
|   | 1 | 1 | 0 | 1 | 0 | 1 |  |  | 0 | 0 | 0 | 1 | 1 | 0 | 1 | 0 | 1 |   |   |   |   | 0 | 0 | 0 |   |
|   | 1 | 0 | 0 | 1 | 0 | 1 |  |  | 0 | 1 | 1 | 0 | 1 | 0 | 1 | 0 | 0 |   |   |   |   | 0 | 0 | 0 |   |
| 1 | 1 | 1 | 0 | 1 | 0 | 1 |  |  | 1 | 0 | 1 | 0 | 1 | 0 | 1 | 0 | 0 | 0 | 0 | 0 | 0 | 1 | 0 | 0 | 1 |
| 1 | 1 | 1 | 0 | 1 | 0 | 1 |  |  | 0 | 0 | 0 | 1 | 1 | 0 | 1 | 0 | 0 | 0 | 0 | 0 | 1 | 1 | 0 | 0 | 1 |
| 1 | 0 | 1 | 1 | 1 | 0 | 1 |  |  | 0 | 0 | 0 | 1 | 0 | 0 | 1 | 0 | 0 | 1 | 0 | 0 | 1 | 0 | 1 | 0 | 0 |
| 1 | 1 | 1 | 0 | 1 | 0 | 1 |  |  | 1 | 1 | 1 | 0 | 1 | 0 | 0 | 0 | 0 | 0 | 0 | 0 | 0 | 1 | 0 | 1 | 0 |
| 1 | 1 | 0 | 0 | 1 | 0 | 1 |  |  | 1 | 1 | 1 | 0 | 1 | 0 | 0 | 0 | 0 | 0 | 0 | 0 | 0 | 1 | 0 | 0 | 1 |
| 1 | 1 | 1 | 0 | 1 | 1 | 1 |  |  | 1 | 0 | 1 | 0 | 1 | 0 | 0 | 0 | 0 | 0 | 0 | 0 | 0 | 1 | 1 | 0 | 0 |
| 1 | 1 | 0 | 0 | 1 | 0 | 1 |  |  | 1 | 0 | 1 | 0 | 1 | 0 | 1 | 0 | 0 | 0 | 0 | 0 | 0 | 1 | 0 | 0 | 1 |
| 1 | 0 | 1 | 0 | 1 | 0 | 1 |  |  | 1 | 0 | 1 | 0 | 0 | 0 | 1 | 1 | 0 | 0 | 0 | 0 | 0 | 1 | 0 | 0 | 1 |
| 1 | 1 | 1 | 0 | 1 | 0 | 1 |  |  | 0 | 0 | 0 | 1 | 1 | 0 | 1 | 0 | 0 | 0 | 0 | 0 | 0 | 1 | 0 | 0 | 1 |
| 1 | 1 | 1 | 0 | 1 | 1 | 1 |  |  | 0 | 0 | 0 | 1 | 1 | 0 | 1 | 0 | 0 | 0 | 0 | 0 | 0 | 1 | 0 | 1 | 1 |
| 1 | 0 | 1 | 0 | 1 | 1 | 1 |  |  | 0 | 0 | 0 | 1 | 1 | 0 | 1 | 0 | 0 | 0 | 0 | 0 | 0 | 1 | 0 | 1 | 1 |
| 1 | 1 | 0 | 0 | 1 | 0 | 1 |  |  | 0 | 0 | 0 | 1 | 1 | 0 | 1 | 0 | 1 | 0 | 0 | 0 | 1 | 0 | 0 | 1 | 1 |
| 1 | 1 | 0 | 1 | 1 | 0 | 1 |  |  | 1 | 0 | 1 | 0 | 1 | 0 | 1 | 0 | 0 | 0 | 0 | 0 | 0 | 1 | 0 | 0 | 1 |
| 1 | 1 | 0 | 1 | 1 | 0 | 1 |  |  | 0 | 1 | 1 | 0 | 0 | 0 | 1 | 0 | 0 | 0 | 0 | 0 | 0 | 1 | 1 | 0 | 1 |
| 1 | 1 | 0 | 0 | 1 | 0 | 1 |  |  | 0 | 0 | 0 | 1 | 1 | 0 | 1 | 0 | 0 | 0 | 0 | 0 | 0 | 1 | 1 | 0 | 1 |
| 1 | 1 | 1 | 0 | 1 | 0 | 1 |  |  | 1 | 0 | 1 | 0 | 1 | 0 | 0 | 0 | 0 | 0 | 0 | 0 | 0 | 1 | 0 | 1 | 1 |
| 1 | 1 | 1 | 1 | 1 | 0 | 1 |  |  | 0 | 0 | 0 | 1 | 1 | 0 | 1 | 0 | 0 | 0 | 0 | 0 | 0 | 1 | 1 | 1 | 1 |
| 1 | 1 | 0 | 0 | 1 | 1 | 1 |  |  | 1 | 1 | 1 | 0 | 1 | 0 | 1 | 0 | 1 | 0 | 0 | 1 | 1 | 1 | 0 | 1 | 1 |
| 1 | 1 | 0 | 1 | 1 | 0 | 1 |  |  | 1 | 0 | 1 | 0 | 1 | 0 | 1 | 0 | 0 | 1 | 0 | 0 | 1 | 0 | 1 | 0 | 0 |
| 1 | 1 | 1 | 0 | 1 | 0 | 1 |  |  | 0 | 1 | 1 | 0 | 1 | 0 | 0 | 0 | 0 | 0 | 0 | 0 | 0 | 1 | 0 | 0 | 1 |
| 1 | 1 | 1 | 0 | 1 | 0 | 1 |  |  | 0 | 0 | 0 | 1 | 1 | 0 | 0 | 0 | 0 | 0 | 0 | 0 | 0 | 1 | 0 | 1 | 1 |
| 1 | 1 | 1 | 1 | 1 | 0 | 1 |  |  | 1 | 0 | 1 | 0 | 1 | 0 | 0 | 0 | 0 | 0 | 0 | 0 | 0 | 1 | 1 | 0 | 0 |
| 1 | 1 | 0 | 0 | 1 | 0 | 1 |  |  | 0 | 1 | 1 | 0 | 1 | 0 | 0 | 0 | 0 | 0 | 0 | 0 | 0 | 1 | 0 | 0 | 1 |
| 1 | 1 | 1 | 1 | 1 | 0 | 1 |  |  | 0 | 0 | 0 | 1 | 1 | 0 | 0 | 1 | 0 | 0 | 0 | 0 | 0 | 1 | 0 | 0 | 1 |
| 1 | 1 | 0 | 0 | 1 | 0 | 1 |  |  | 0 | 1 | 1 | 0 | 1 | 0 | 0 | 1 | 0 | 0 | 0 | 0 | 0 | 1 | 0 | 0 | 1 |
| 1 | 1 | 1 | 0 | 1 | 0 | 1 |  |  | 1 | 0 | 1 | 0 | 1 | 0 | 0 | 0 | 1 | 0 | 0 | 0 | 0 | 1 | 0 | 1 | 1 |
| 1 | 1 | 1 | 1 | 1 | 0 | 1 |  |  | 1 | 0 | 1 | 0 | 1 | 0 | 0 | 0 | 0 | 0 | 0 | 0 | 0 | 1 | 1 | 0 | 0 |
| 1 | 1 | 1 | 0 | 1 | 0 | 1 |  |  | 1 | 1 |   | 0 | 1 | 0 | 1 | 0 | 0 | 0 | 0 | 0 | 1 | 1 | 1 | 0 | 0 |



|   |   |   |   |   |   |   |  |  |   |   |  |   |   |   |   |   |   |   |   |   |   |   |   |   |   |   |   |
|---|---|---|---|---|---|---|--|--|---|---|--|---|---|---|---|---|---|---|---|---|---|---|---|---|---|---|---|
| 1 | 1 | 1 | 1 | 1 | 0 | 1 |  |  | 1 | 1 |  | 0 | 1 | 0 | 1 | 0 | 1 | 0 | 0 | 0 | 1 | 0 |   |   | 1 | 1 |   |
| 1 | 0 | 1 | 0 | 1 | 0 | 1 |  |  | 0 | 1 |  | 0 | 1 | 0 | 1 | 0 | 0 | 0 | 0 | 0 | 0 | 1 | 0 |   |   | 1 | 1 |
| 1 | 1 | 1 | 0 | 1 | 0 | 1 |  |  | 0 | 0 |  | 1 | 1 | 0 | 1 | 0 | 1 | 0 | 0 | 0 | 1 | 0 |   |   | 1 | 1 |   |
| 1 | 1 | 1 | 0 | 1 | 1 | 1 |  |  | 1 | 0 |  | 0 | 1 | 0 | 1 | 0 | 1 | 0 | 0 | 1 | 1 | 0 |   |   | 1 | 1 |   |
| 1 | 0 | 1 | 0 | 1 | 0 | 1 |  |  | 0 | 0 |  | 1 | 1 | 0 | 1 | 0 | 1 | 0 | 0 | 0 | 1 | 0 |   |   | 1 | 1 |   |
| 1 | 1 | 1 | 0 | 1 | 0 | 1 |  |  | 0 | 1 |  | 0 | 1 | 0 | 1 | 0 | 0 | 0 | 0 | 0 | 1 | 1 | 0 |   |   | 1 | 1 |
| 1 | 0 | 1 | 0 | 1 | 1 | 1 |  |  | 1 | 0 |  | 0 | 1 | 0 | 1 | 0 | 1 | 0 | 1 | 0 | 1 | 0 |   |   | 1 | 0 |   |
| 1 | 0 | 1 | 1 | 1 | 0 | 1 |  |  | 0 | 0 |  | 1 | 1 | 0 | 1 | 0 | 1 | 1 | 0 | 1 | 1 | 0 |   |   | 1 | 0 |   |
| 1 | 1 | 1 | 0 | 1 | 0 | 1 |  |  | 0 | 1 |  | 0 | 1 | 0 | 1 | 0 | 1 | 0 | 0 | 1 | 1 | 0 |   |   | 1 | 0 |   |
| 1 | 1 | 1 | 1 | 1 | 0 | 1 |  |  | 0 | 0 |  | 1 | 1 | 0 | 1 | 0 | 1 | 1 | 0 | 0 | 1 | 1 |   |   | 1 | 0 |   |
| 1 | 1 | 0 | 0 | 1 | 0 | 1 |  |  | 0 | 0 |  | 1 | 1 | 0 | 1 | 0 | 1 | 1 | 0 | 1 | 0 | 0 |   |   | 1 | 0 |   |
| 1 | 1 | 1 | 0 | 1 | 0 | 1 |  |  | 0 | 1 |  | 0 | 1 | 0 | 1 | 0 | 0 | 1 | 0 | 0 | 1 | 0 |   |   | 1 | 0 |   |
| 1 | 1 | 0 | 0 | 1 | 0 | 1 |  |  | 1 | 0 |  | 0 | 1 | 0 | 1 | 0 | 0 | 0 | 0 | 0 | 0 | 1 | 0 |   |   | 1 | 1 |
| 1 | 1 | 0 | 0 | 1 | 1 | 1 |  |  | 0 | 1 |  | 0 | 1 | 0 | 1 | 0 | 1 | 0 | 0 | 1 | 1 | 0 |   |   | 1 | 1 |   |
| 1 | 1 | 0 | 1 | 0 | 1 | 1 |  |  | 0 | 1 |  | 0 | 1 | 0 | 1 | 0 | 1 | 0 | 0 | 1 | 1 | 0 |   |   | 1 | 1 |   |
| 1 | 1 | 0 | 0 | 1 | 0 | 1 |  |  | 0 | 1 |  | 0 | 1 | 0 | 1 | 0 | 1 | 0 | 0 | 0 | 0 | 1 | 0 |   |   | 1 | 0 |
| 0 | 0 | 1 | 1 | 1 | 0 | 1 |  |  | 1 | 0 |  | 0 | 0 | 0 |   | 1 | 1 | 0 | 1 | 0 | 0 | 0 |   |   | 1 | 1 |   |
| 0 | 1 | 1 | 0 | 1 | 0 | 1 |  |  | 1 | 0 |  | 0 | 1 | 0 | 1 | 0 | 0 | 0 | 0 | 0 | 0 | 1 |   |   | 1 | 1 |   |
| 1 | 1 | 0 | 0 | 1 | 0 | 1 |  |  | 1 | 0 |  | 0 | 1 | 0 | 1 | 0 | 0 | 0 | 0 | 0 | 0 | 1 |   |   | 1 | 1 |   |
| 0 | 1 | 1 | 0 | 1 | 0 | 1 |  |  | 0 | 1 |  | 0 | 1 | 0 | 1 | 0 | 0 | 0 | 0 | 0 | 1 | 1 |   |   | 1 | 1 |   |
| 0 | 1 | 1 | 0 | 1 | 0 | 1 |  |  | 1 | 0 |  | 0 | 0 | 0 |   | 1 | 1 | 0 | 0 | 0 | 0 | 1 |   |   | 1 | 1 |   |
| 1 | 1 | 0 | 0 | 1 | 0 | 1 |  |  | 1 | 1 |  | 0 | 0 | 0 |   | 1 | 1 | 0 | 1 | 0 | 0 | 0 |   |   | 1 | 1 |   |
| 1 | 1 | 1 | 0 | 1 | 0 | 1 |  |  | 1 | 0 |  | 0 | 0 | 0 |   | 1 | 1 | 0 | 1 | 0 | 0 | 0 |   |   | 1 | 0 |   |
| 1 | 1 |   | 0 | 1 | 0 | 1 |  |  | 1 | 0 |  | 0 | 0 | 0 |   | 0 | 0 | 0 | 0 | 0 | 1 |   |   | 1 | 1 |   |   |
| 0 | 1 |   | 0 | 1 | 0 | 1 |  |  | 1 | 0 |  | 0 | 0 | 0 |   | 0 | 0 | 0 | 0 | 1 |   |   | 1 | 1 | 1 | 1 |   |
| 0 | 1 |   | 0 | 1 | 0 | 1 |  |  | 1 | 0 |  | 0 | 0 | 0 |   | 0 | 0 | 0 | 0 | 1 |   |   | 1 | 1 | 1 | 1 |   |

|   |   |   |   |   |   |   |   |   |   |   |   |   |  |  |  |   |   |   |   |   |  |  |  |   |   |   |
|---|---|---|---|---|---|---|---|---|---|---|---|---|--|--|--|---|---|---|---|---|--|--|--|---|---|---|
| 1 | 1 | 0 | 1 | 0 | 1 | 1 | 0 | 1 | 0 | 0 | 1 |   |  |  |  | 0 | 0 | 0 | 1 |   |  |  |  | 1 | 1 |   |
| 1 | 1 | 1 | 1 | 0 | 1 | 1 | 0 | 0 | 1 | 0 | 1 | 0 |  |  |  | 0 | 0 | 1 | 0 | 1 |  |  |  |   | 1 | 0 |
| 1 | 1 | 0 | 1 | 0 | 1 | 1 | 0 | 1 | 0 | 0 | 1 | 0 |  |  |  | 0 | 0 | 0 | 1 | 0 |  |  |  |   | 1 | 1 |
| 1 | 1 | 0 | 1 | 0 | 1 | 1 | 0 | 0 | 0 | 1 | 1 | 0 |  |  |  | 1 | 0 | 0 | 1 | 1 |  |  |  |   | 1 | 1 |
| 1 | 1 | 0 | 1 | 0 | 1 | 1 | 0 | 1 | 0 | 0 | 1 | 0 |  |  |  | 1 | 0 | 1 | 1 | 1 |  |  |  |   | 1 | 0 |
| 1 | 1 | 0 | 1 | 0 | 1 | 1 | 1 | 1 | 1 | 0 | 1 | 0 |  |  |  | 1 | 0 | 0 | 0 | 1 |  |  |  |   | 1 | 1 |
| 1 | 1 | 0 | 1 | 0 | 1 | 1 | 1 | 1 | 0 | 0 | 1 |   |  |  |  |   |   |   | 0 | 1 |  |  |  |   | 1 |   |
| 1 |   | 0 | 1 | 0 | 1 | 1 | 0 | 0 | 1 | 0 | 1 |   |  |  |  |   |   |   | 0 | 1 |  |  |  |   | 1 |   |
| 1 |   | 0 | 1 | 1 | 1 | 1 | 0 | 0 | 1 | 0 | 1 |   |  |  |  |   |   |   | 0 | 1 |  |  |  |   | 1 |   |
| 1 |   | 0 | 1 | 0 | 1 | 1 | 0 | 0 | 0 | 1 | 1 |   |  |  |  |   |   |   | 0 | 1 |  |  |  |   | 1 |   |
| 1 | 0 | 1 | 1 | 0 | 1 | 1 | 0 | 0 | 1 | 0 | 0 |   |  |  |  |   |   |   | 0 | 1 |  |  |  |   | 1 |   |
| 1 | 1 | 0 | 1 | 0 | 1 | 1 | 1 | 0 | 0 | 1 | 1 |   |  |  |  |   |   |   | 0 | 1 |  |  |  |   | 1 |   |
| 1 | 1 | 0 | 1 | 0 | 1 | 1 | 1 | 0 | 0 | 1 | 1 |   |  |  |  |   |   |   | 0 | 1 |  |  |  |   | 1 |   |
| 1 | 1 | 0 | 1 | 0 | 1 | 1 | 1 | 1 | 0 | 0 | 1 |   |  |  |  |   |   |   | 0 | 1 |  |  |  |   | 1 |   |
| 1 | 1 | 0 | 1 | 0 | 1 | 1 | 0 | 1 | 1 | 0 | 0 |   |  |  |  |   |   |   | 0 | 1 |  |  |  |   | 1 |   |
| 1 | 1 | 0 | 1 | 1 | 1 |   | 1 | 0 | 0 | 1 | 1 |   |  |  |  |   |   |   | 0 | 0 |  |  |  |   | 1 |   |
| 1 | 0 | 0 | 1 | 0 | 1 | 1 | 0 | 1 | 1 | 0 | 1 |   |  |  |  |   |   |   | 1 | 1 |  |  |  |   | 1 |   |
|   |   | 1 | 1 | 0 | 1 | 1 | 0 | 0 | 0 | 1 | 1 |   |  |  |  | 1 |   |   | 1 | 0 |  |  |  |   | 1 |   |
|   |   | 0 | 1 | 0 | 1 | 0 | 1 | 1 | 0 | 0 | 1 |   |  |  |  | 0 |   |   | 0 | 1 |  |  |  |   | 1 |   |
|   |   | 0 | 1 | 0 | 1 | 1 | 1 | 1 | 0 | 0 | 1 |   |  |  |  | 0 |   |   | 1 | 1 |  |  |  |   | 1 |   |
|   |   | 0 | 1 | 0 | 1 | 0 | 0 | 0 | 0 | 1 | 1 |   |  |  |  | 1 |   |   | 1 | 1 |  |  |  |   | 1 |   |
|   |   | 0 | 1 | 0 | 1 | 0 | 0 | 0 | 0 | 1 | 1 |   |  |  |  | 1 |   |   | 0 | 1 |  |  |  |   | 1 |   |
|   |   | 0 | 1 | 0 | 1 | 1 | 0 | 0 | 0 | 1 | 1 |   |  |  |  | 1 |   |   | 1 | 1 |  |  |  |   | 1 |   |
|   |   | 0 | 1 | 0 | 1 | 1 | 0 | 0 | 0 | 1 | 1 |   |  |  |  | 1 |   |   | 1 |   |  |  |  |   | 1 |   |
|   |   | 0 | 1 | 0 | 1 | 1 | 0 | 1 | 0 | 0 | 1 |   |  |  |  | 1 |   |   | 0 |   |  |  |  |   | 1 |   |
|   |   | 0 | 1 | 0 | 1 | 0 | 0 | 1 | 0 | 0 | 1 |   |  |  |  | 0 |   |   | 0 |   |  |  |  |   | 1 |   |
|   |   | 0 | 1 | 0 | 1 | 1 | 0 | 0 | 1 | 0 | 1 |   |  |  |  | 0 |   |   | 1 |   |  |  |  |   | 1 |   |
|   |   | 0 | 1 | 0 | 1 | 1 | 1 | 1 | 1 | 0 | 1 |   |  |  |  |   |   |   | 1 |   |  |  |  |   | 1 |   |
|   |   | 0 | 1 | 0 | 1 | 1 | 1 | 0 | 0 | 1 | 1 |   |  |  |  |   |   |   | 0 |   |  |  |  |   | 1 |   |
